# Supplementary material
Source: PubMed Central journal article supplement (PMC6198470)
Supplement: develop-145-165795-s1.pdf [file develop-145-165795-s1.pdf]

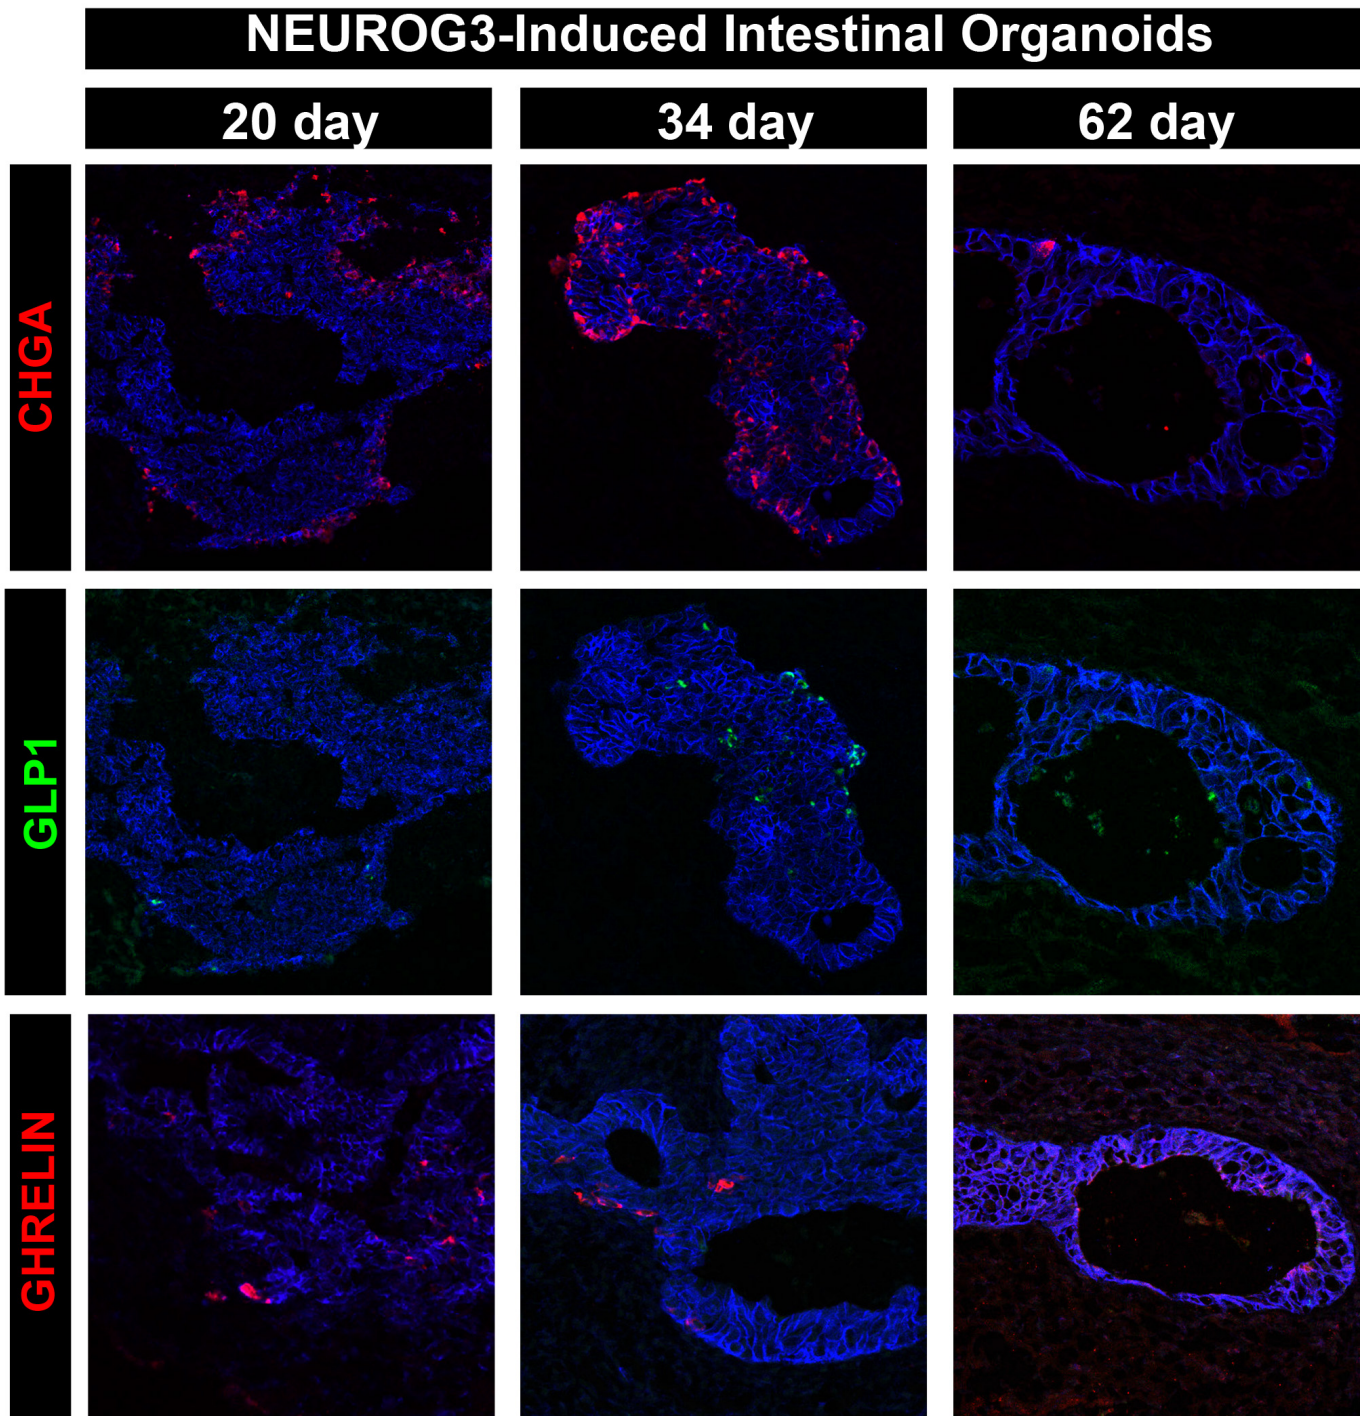

**Fig. S1. Related to Figure 1. 34 day-old organoids are optimal for NEUROG3 Induction**

20, 34, and 62-day old HIOs were given doxycycline to induce NEUROG3 expression. While 20 day and 34 day HIOs were capable of inducing many CHGA positive cells, 62 day HIOs did not respond as readily to forced NEUROG3 expression. In addition, staining with hormone-specific markers, we found that 34-day old HIOs give rise to more differentiated subtypes, which are not found in 20-day HIOs. From these data, we conclude that 34-day HIOs are optimally competent for NEUROG3 induction and EEC specification.

**A**

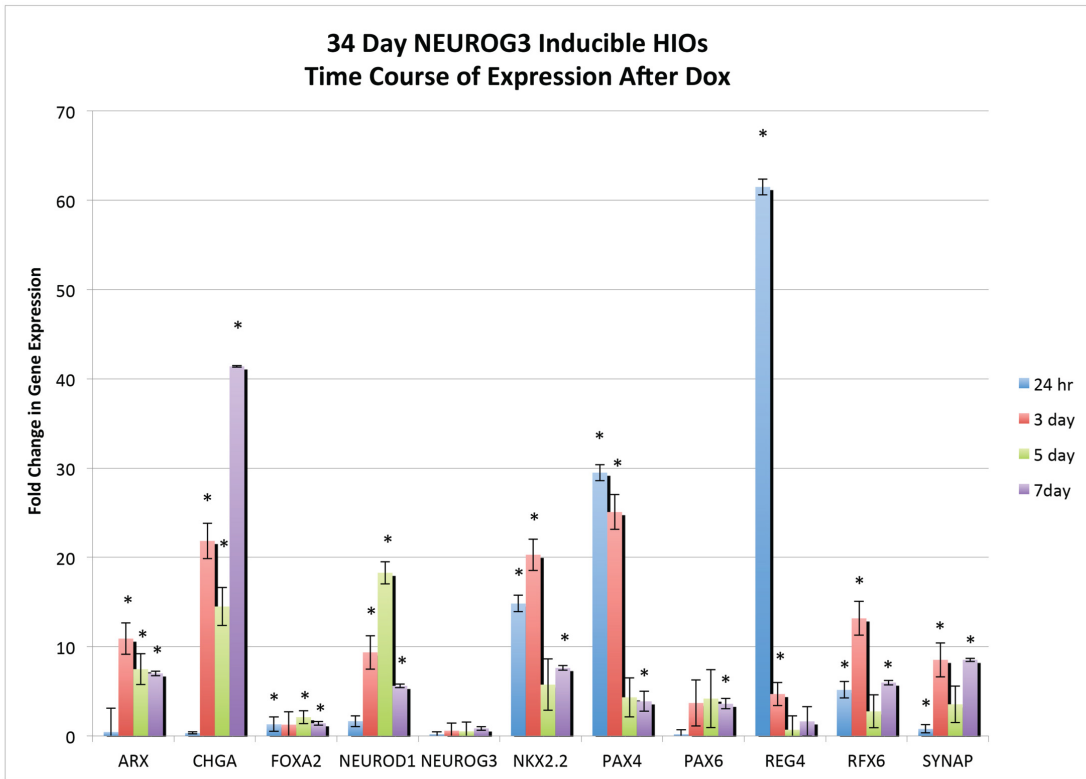

**B**

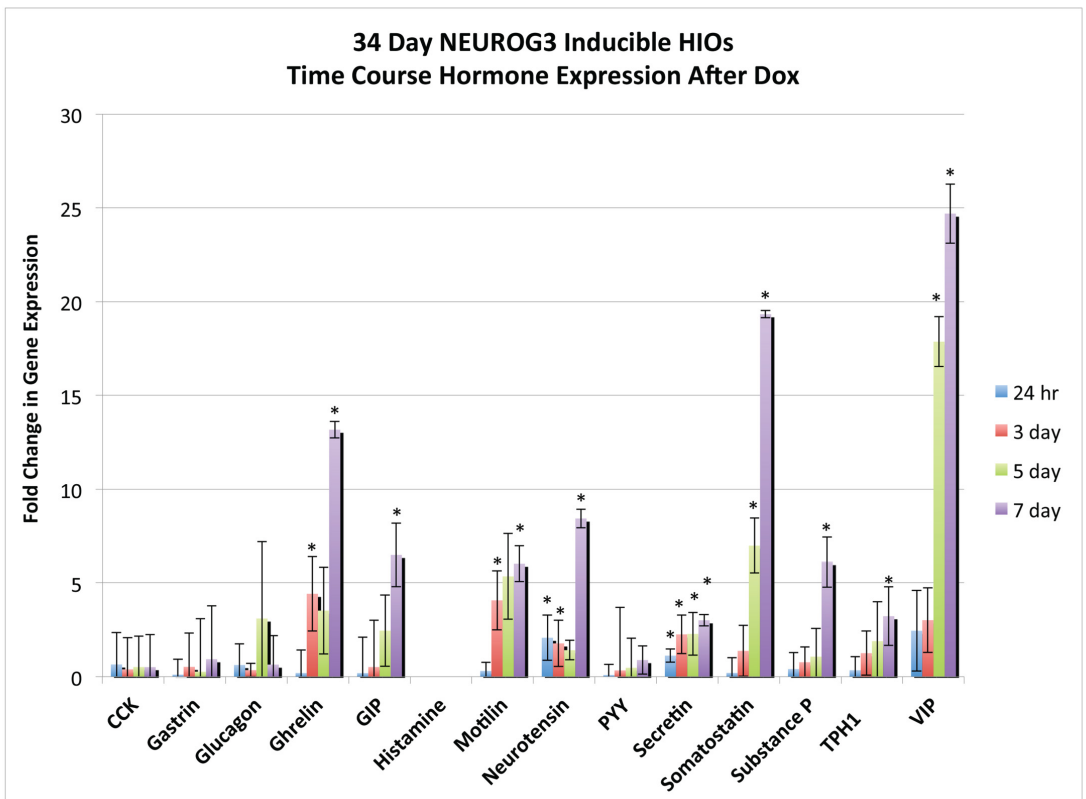

**Fig. S2. Related to Figure 3. Time-course of hormone and transcription factor expression in NEUROG3-induced HIOs**

(A) Gene expression in HIOs 24-hr, 3 day, 5 day, and 7 days after the 8-hr pulse of doxycycline. Certain TF's that are known direct targets of NEUROG3 (*NKX2.2*) are up-regulated at 24-hr, whereas later genes that differentiate hormone subtypes and indicate vesicle maturity (*ARX*, *CHGA*, respectively) are up-regulated and maintained at 3-, 5-, and 7 days post doxycycline. (B) Gene expression of hormone subtypes 24-hr, 3 days, 5 days, and 7 days after doxycycline. Interesting, proximal subtypes CCK and Gastrin were not readily up-regulated at any time-point. Serotonin is produced from the *TPHI* gene. Values in graphs represent mean  $\pm$  S.E.M. \*P<0.05, (n=3).

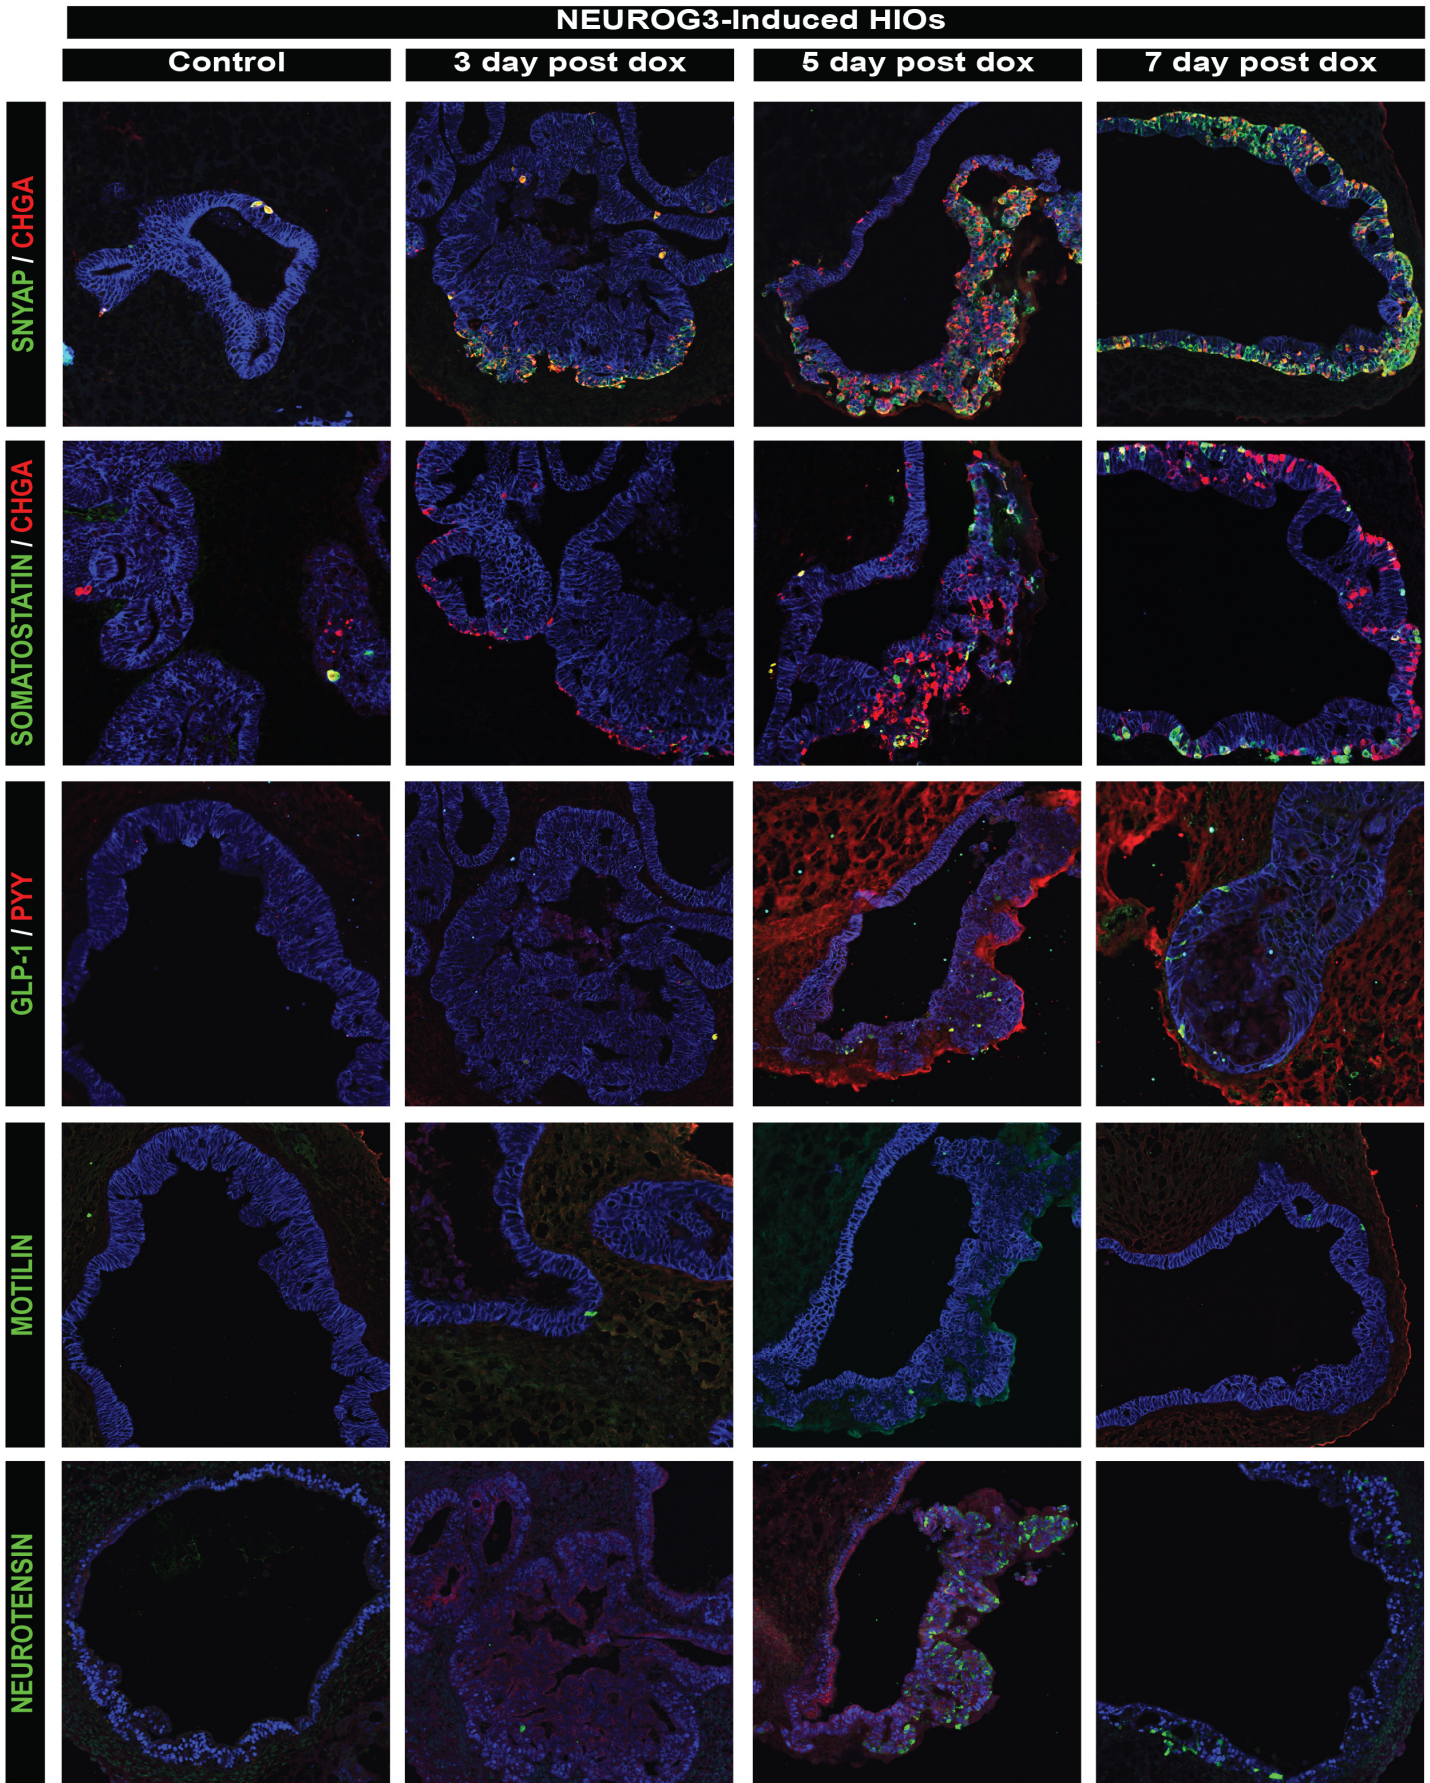

**Fig. S3. Related to Figure 4. Time-course of protein expression of NEUROG3-induced hormones**

A subset of hormone-positive subtypes are induced over the course of a week after NEUROG3 induction. Hormone staining and subtype differentiation at 3 days, 5 days, and 7 days post doxycycline induction. Few EECs are observed in the control, as marked by CHGA and SYNAP. However, after induction, significantly more EECs are specified and go onto differentiate into Somatostatin, GLP-1, Motilin, and Neurotensin-positive cells. Images are meant to highlight the presence and variety of cell types induced in the HIO, but are not representative of the entire HIO epithelium.

**A**

### Secreted Active GIP

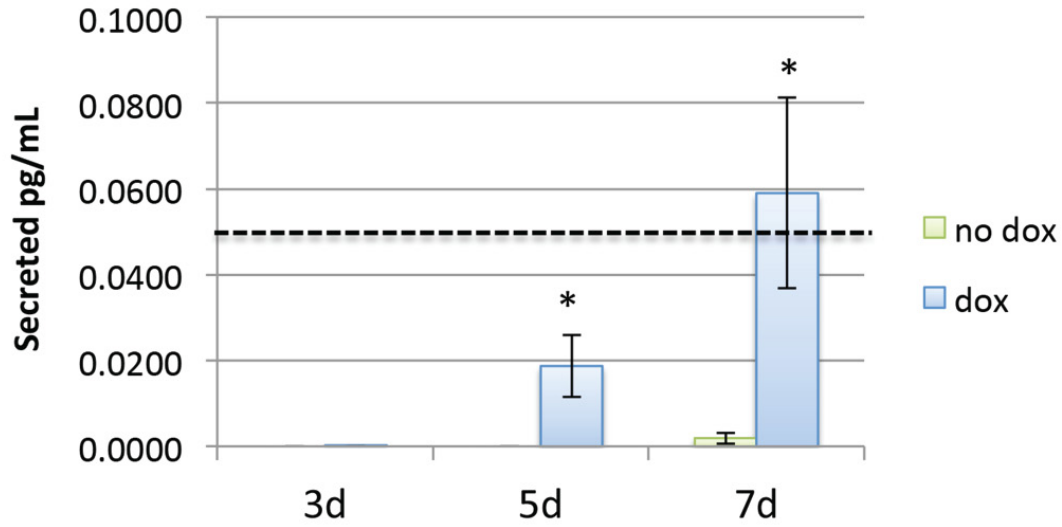

**B**

### Secreted Total GLP-1

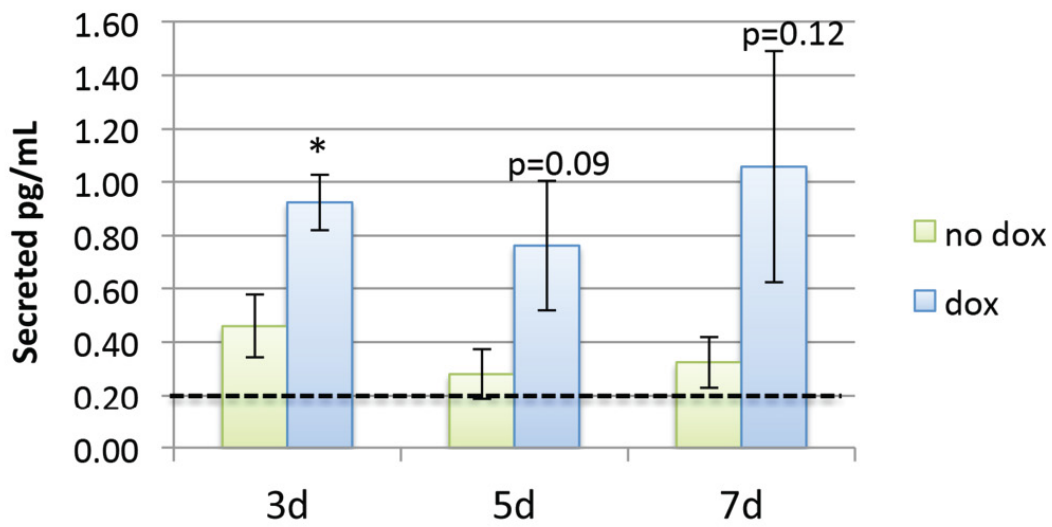

**Fig. S4. Related to Figure 4. Secretion of Hormones in NEUROG3-induced HIOs**

Time-course of EEC hormone secretion post doxycycline exposure. **(A)** Active GIP secretion is only observed at 7 days after forced NEUROG3 expression. **(B)** While some detectable GLP-1 was secreted at 3-, 5-, and 7 days after NEUROG3 induction, we did not observe a significant increase at 5- and 7-days as compared to un-induced controls. This was possibly owing to the fact that more proximal HIOs induce differentiation and secretion of proximal hormones. Dotted lines represent detection limits for ELISA assays. iPSC lines were used for the secretion studies. (n=6 for each time-point)

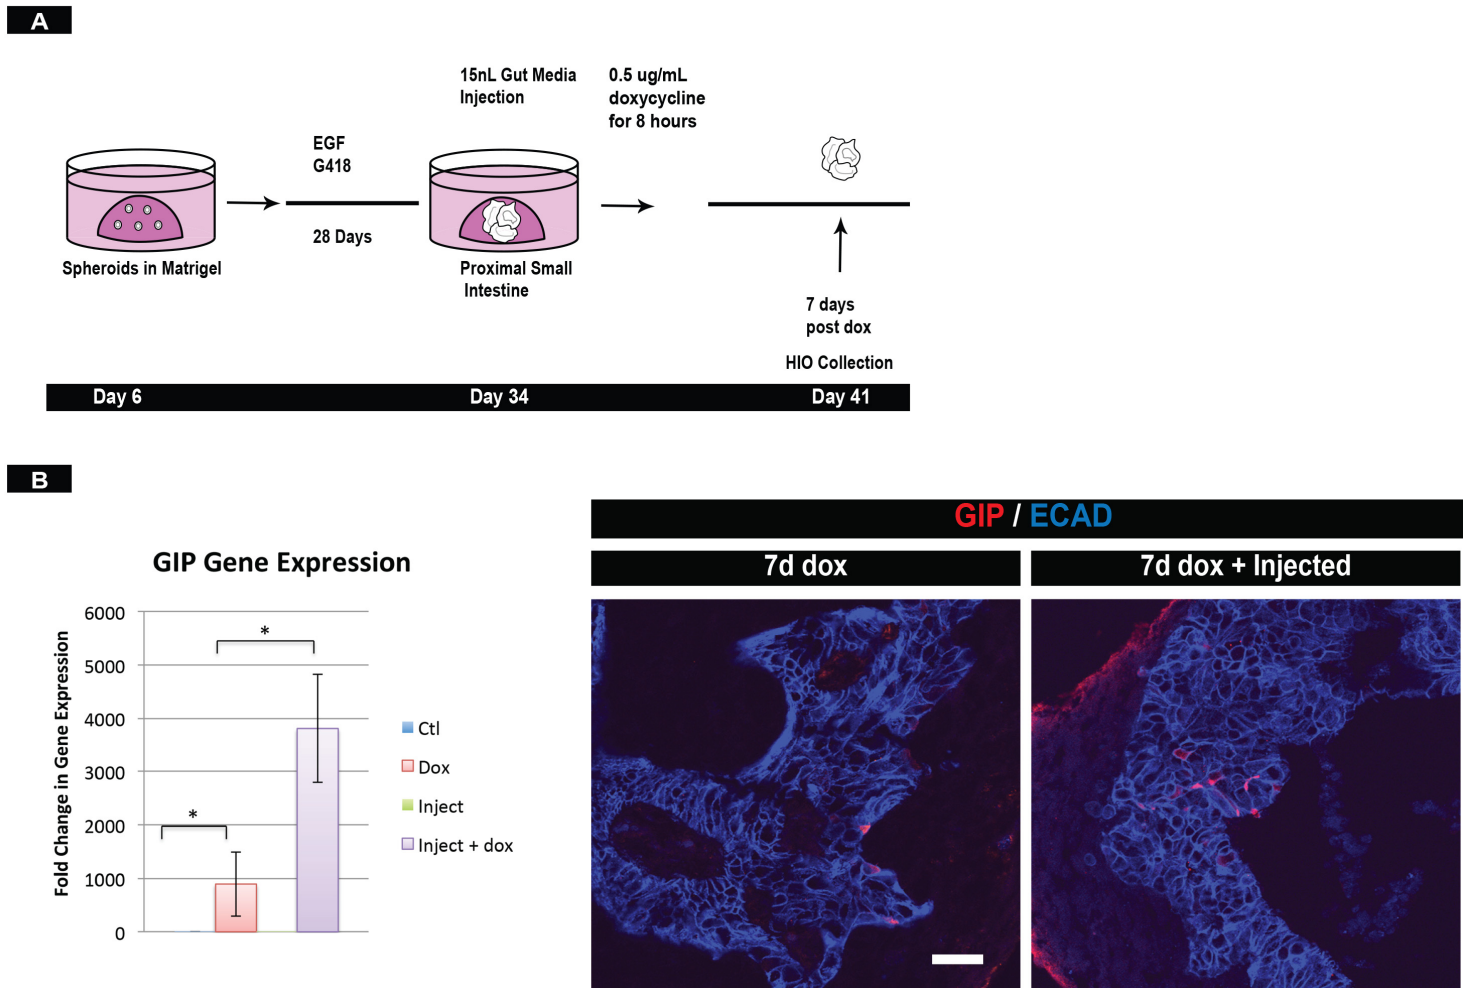

**Fig. S5. Related to Figure 5. NEUROG3-induced HIOs respond to luminal nutrients.**

(A) Schematic of injection experiment. 34-day HIOs were given 15nL of gut media (glucose, essential amino acids, serum) and then pulsed with doxycycline to induce NEUROG3. 7 days after doxycycline, HIOs were collected. (B) qPCR of induced-injected HIOs reveals an increase in *GIP* mRNA, indicating HIOs are transcriptionally responsive to luminal nutrients. Immunofluorescence for GIP protein indicates that induced-injected HIOs also have more GIP<sup>+</sup> cells, indicating luminal nutrients may potentiate GIP EEC differentiation. \* $P < 0.05$ , (n=3).



**Table S1. Summary Location of Gut Enteroendocrine Hormones**

| Cell | Hormone          | Stomach      | Duodenum | Jejunum | Ileum | Colon |
|------|------------------|--------------|----------|---------|-------|-------|
| G    | Gastrin          |              |          |         |       |       |
| X/A  | Ghrelin/Motilin  | Ghrelin Only |          |         |       |       |
| S    | Secretin         |              |          |         |       |       |
| I    | CCK              |              |          |         |       |       |
| K    | GIP              |              |          |         |       |       |
| L    | GLP-1            |              |          |         |       |       |
| (L)  | PYY              |              |          |         |       |       |
| (L)  | INSL5            |              |          |         |       |       |
| N    | Neurotensin      |              |          |         |       |       |
| D    | Somatostatin     |              |          |         |       |       |
| EC   | Substance-P/5'HT |              |          |         |       |       |

\*The intensity of blue shading indicates the localization of the hormone within that region. As the shading gets lighter, the enteroendocrine cell and hormone presence is less prevalent in that region of the intestine. As seen, most hormones have a gradient of expression pattern within the intestinal epithelium, with the exception of D and EC cells, which are found throughout the gastrointestinal tract.

**Table S2. Primary Antibody List**

| Primary Antibody       | Source          | Catalog Number | Dilution |
|------------------------|-----------------|----------------|----------|
| Goat anti-Somatostatin | Santa Cruz      | SC-7819        | 1:200    |
| Goat anti-Glut2        | Santa Cruz      | SC-7580        | 1:500    |
| Mouse anti-Muc6        | Abcam           | Ab49462        | 1:500    |
| Mouse anti-Cdx2        | BioGenex        | Cdx2-88        | 1:500    |
| Goat anti-Pdx1         | Abcam           | Ab94931        | 1:5000   |
| Mouse anti-Ecad        | BD Transduction | 610182         | 1:500    |
| Rat anti-Ecad          | R&D             | MAB7481        | 1:1000   |
| Goat anti-Ecad         | R&D             | AF648          | 1:500    |

|                               |                  |           |        |
|-------------------------------|------------------|-----------|--------|
| Rabbit anti-PYY               | Abcam            | 22663     | 1:1000 |
| Rabbit anti-ChromograninA     | Immunostar       | 20086     | 1:500  |
| Goat anti-ChromograninA       | Santa Cruz       | Sc-1488   | 1:200  |
| Goat anti-Ghrelin             | Santa Cruz       | SC-10368  | 1:300  |
| Mouse anti-GLP-1              | Biovision        | 3104-100  | 1:200  |
| Goat anti-CCK                 | Santa Cruz       | SC-21617  | 1:200  |
| Goat anti-GIP                 | Santa Cruz       | SC-23554  | 1:500  |
| Mouse anti-Motilin            | Santa Cruz       | SC-376605 | 1:100  |
| Rabbit anti-5'HT              | Immunostar       | 20080     | 1:1000 |
| Guinea Pig anti-Synaptophysin | Synaptic Systems | 101004    | 1:1000 |
| Rabbit anti-Gastrin           | DAKO             | A0568     | 1:500  |

**Table S3. Primer List**

Primers sets for qPCR detection of human hormone transcript. Those not listed were obtained from a predesigned 96-well TaqMan array plate from Life Technologies.

| Hormone Transcript | Primers                                                                        |
|--------------------|--------------------------------------------------------------------------------|
| <i>GHRELIN</i>     | Forward: GCT GGT ACT GAA CCC CTG AC<br>Reverse: GAT GGA GGT CAA GCA GAA GG     |
| <i>GIP</i>         | Forward: GTT GAG GGC TGC TCA CCT TA<br>Reverse: GGC AGT GGG ACT AGG AGA GA     |
| <i>MOTILIN</i>     | Forward: TCC AAT TTC CAG AGG AGC AG<br>Reverse: CCC TGA GTG TAT GGC AGA GG     |
| <i>GCG</i>         | Forward: CAG CAA GTA TCT GGA CTC CAG G<br>Reverse: CCA GTT TAT AAA GTC CCT GGC |
| <i>CHGA</i>        | Forward: TGT GTC GGA GAT GAC CTC AA<br>Reverse: GTC CTG GCT CTT CTG CTC TG     |
